# Supplementary material
Source: PubMed Central journal article supplement (PMC5621872)
Supplement: jciinsight-2-93961-s001.pdf [file jciinsight-2-93961-s001.pdf]

## Supplemental data

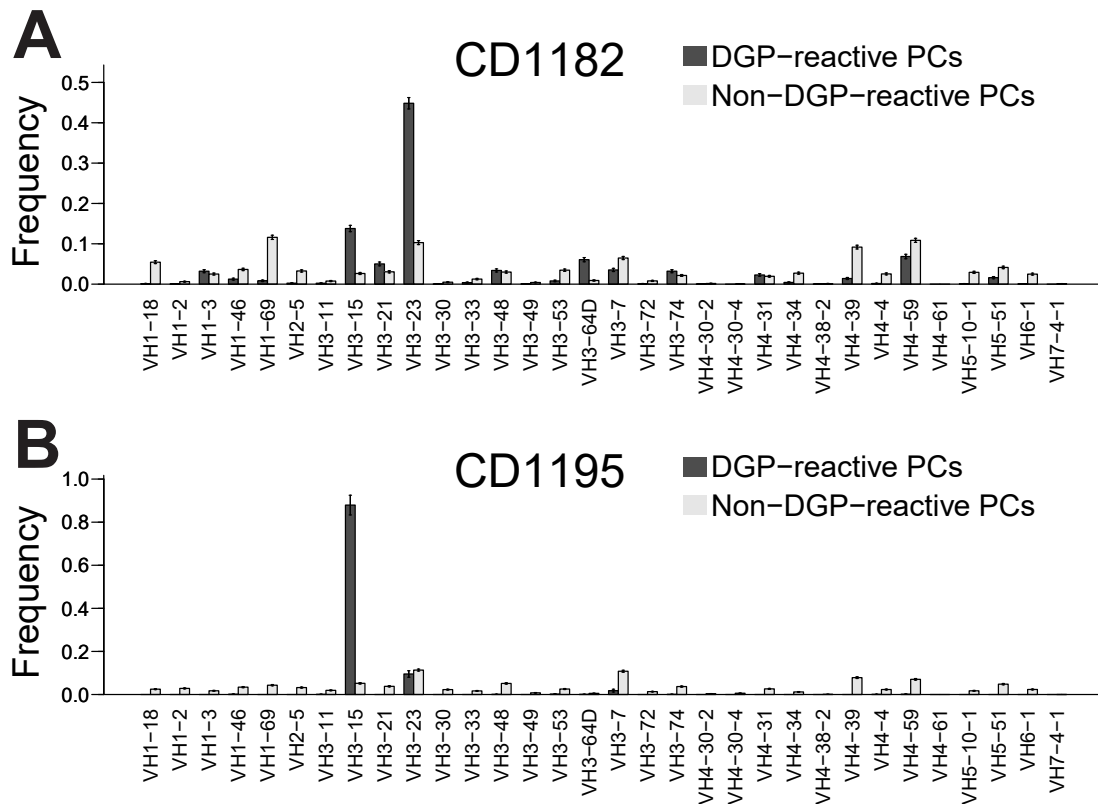

**Supplementary Figure 1** *IGHV* repertoire of DGP-reactive and non-DGP-reactive PCs.

*IGHV* gene repertoire of DGP-reactive and non-DGP-reactive PCs from two CD patients with active disease. **(A)** A representative patient, CD1182, in whom DGP-reactive PCs predominantly used *IGHV3-23*. **(B)** *IGHV* repertoire of CD1195 for whom *IGHV3-15* dominance was observed. Bars represent the frequency of different *IGHV* gene segments  $\pm$  Poisson CI with normal approximation.

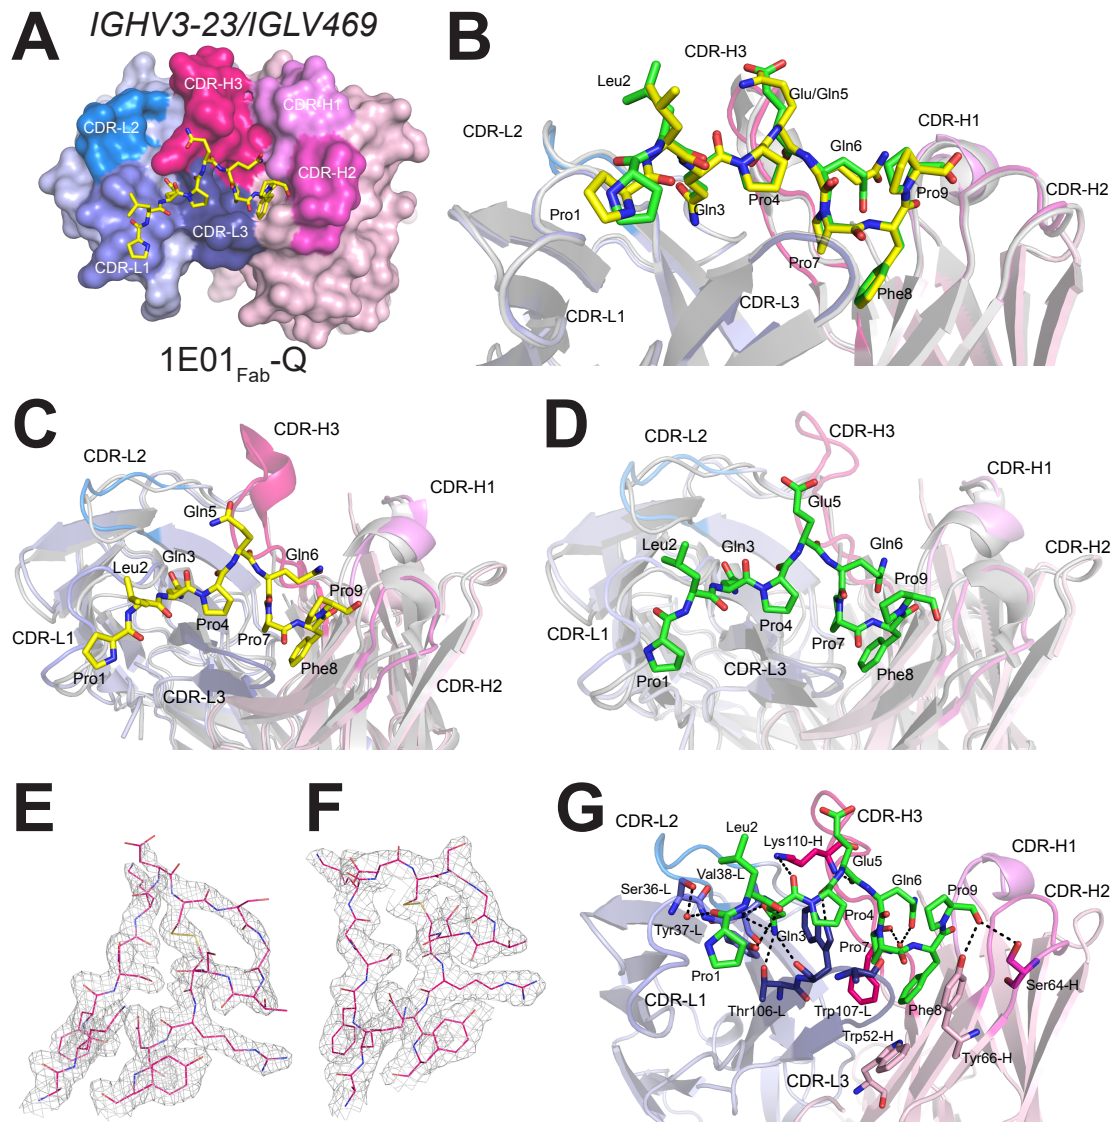

**Supplementary Figure 2 Binding of native and deamidated gliadin epitope to 1E01<sub>Fab</sub>.**

(A) Docking of the native gliadin peptide PLQPQQPFP to the hmAb 1E01. (B) Superimposed depiction of the native (yellow) and deamidated (green) gliadin peptides while docking to 1E01. (C) Superimposed depiction of 1E01<sub>Fab</sub> alone and 1E01<sub>Fab</sub>-Q or (D) 1E01<sub>Fab</sub>-E. (E and F) Electron density plots for the CDR-H3 of 1E01<sub>Fab</sub>-Q (E) and 1E01<sub>Fab</sub>-E (F). (Molecules 1 in the asymmetric units are shown). (G) Epitope/paratope interaction in 1E01<sub>Fab</sub>-E. Interacting residues of the Fab are drawn as sticks with nitrogen atoms in blue and oxygen atoms in red. Black dotted lines represent hydrogen bonds and water molecules are presented as red balls.

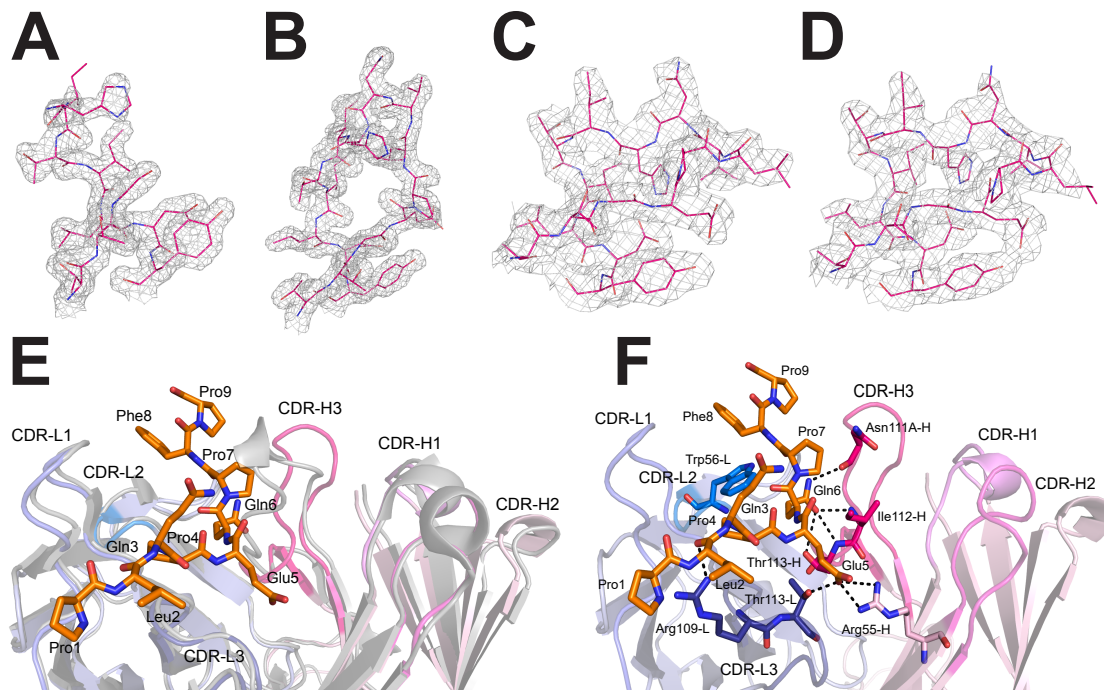

**Supplementary Figure 3 Electron density and epitope/paratope interaction of 1E03.**

(A-D) Electron density plots of the CDR-H3 of 1E03<sub>Fab</sub> alone (molecules 1 and 2 of the asymmetric unit are shown in panel A and B, respectively). Five amino acids were missing in molecule 1. Electron density plots of CDR-H3 of 1E03<sub>Fab</sub>-E (molecules 1 and 2 of the asymmetric unit are shown in panel C and D, respectively). (E) Superimposed depiction of 1E03<sub>Fab</sub> alone and 1E03<sub>Fab</sub>-E. (F) Epitope/paratope interaction in 1E03<sub>Fab</sub>-E. Interacting residues, hydrogen bonds and color codes are as in Supplementary Figure 2G.

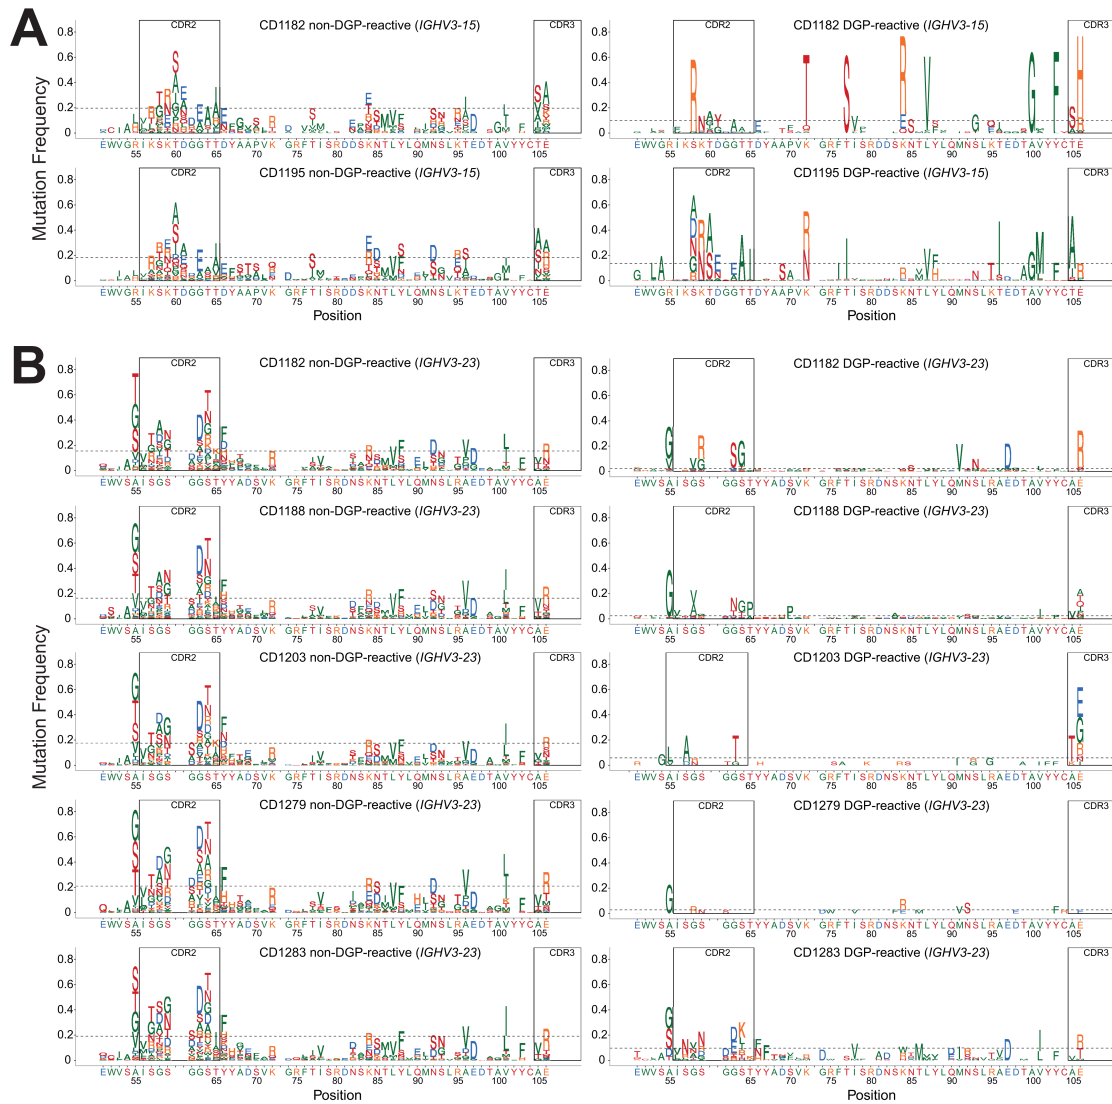

**Supplementary Figure 4 Somatic mutations in DGP-reactive and non-DGP-reactive PCs.**

Average frequency of amino acid substitution in non-DGP-reactive and DGP-reactive PCs along the (A) *IGHV3-15* and the (B) *IGHV3-23* gene segments from additional CD patients from whom thirty sequences or more were available for mutation analysis. Data from CD1287 is presented in Figures 3 and 4.

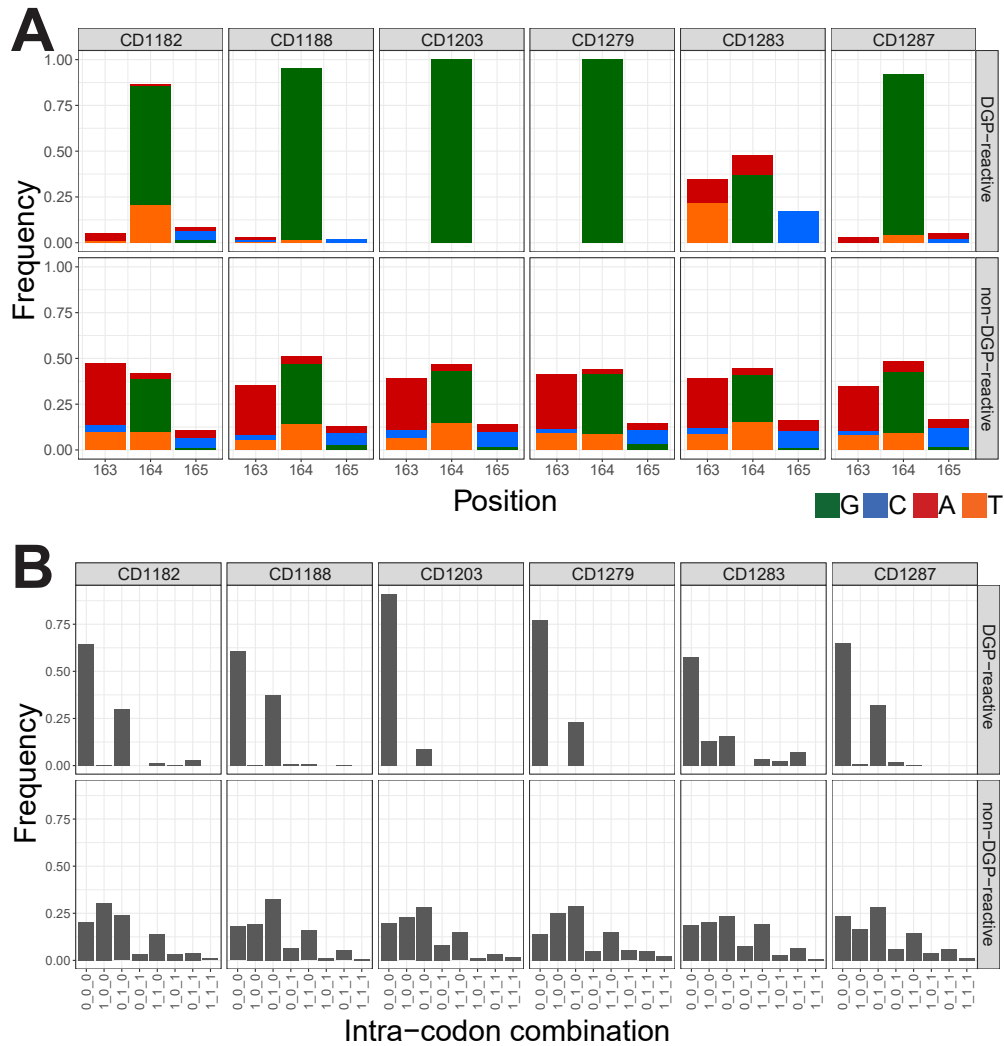

**Supplementary Figure 5 Intra codon nucleotide substitution patterns at position 55.**

(A) Nucleotide substitutions at codon 55 (consisting of nucleotides 163, 164 and 165) of *IGHV3-23* in DGP-reactive and non-DGP-reactive PCs. (B) Distribution of combinations of nucleotide substitutions for codon 55 of *IGHV3-23* in DGP-reactive and non-DGP-reactive PCs. Eight possible combinations with the following patterns are possible: [0 0 0] no substitution; [1 0 0], [0 1 0] and [0 0 1] single substitution at positions 1, 2 or 3, respectively; [1 1 0], [1 0 1] and [0 1 1] correspond with two substitutions at positions 1 and 2, 1 and 3, or 2 and 3: [1 1 1] substitution in all three nucleotides. The differences in substitution pattern between DGP-reactive and non-DGP-reactive PCs were significant,  $p=1.46 \times 10^{-14}$ .

**Supplementary Table 1** Number of unique sequences

| <b>Patient</b> | <b>Non-DGP-specific PCs</b> | <b>DGP-specific PCs</b> |
|----------------|-----------------------------|-------------------------|
| CD1182         | 3001                        | 691                     |
| CD1188         | 7614                        | 858                     |
| CD1190         | 20100                       | 93                      |
| CD1195         | 11287                       | 1613                    |
| CD1203         | 4118                        | 56                      |
| CD1210         | 6000                        | 256                     |
| CD1218         | 9480                        | 43                      |
| CD1279         | 7343                        | 41                      |
| CD1283         | 6073                        | 209                     |
| CD1287         | 13579                       | 853                     |

**Supplementary Table 2** Primers for induction of site-directed mutagenesis

| <b>Primer name</b>   | <b>Sequence</b>                        |
|----------------------|----------------------------------------|
| 1E03_IGHV3-15_R55H   | CTGGAGTGGGTGGCCATATTAACCAACACTG        |
| 1E03_IGKV4-1_T113A   | ACTGTCAGCAATATTATAGAGCTCCCCCTCTCACGTT  |
| 1E01_IGHV3-23_Ala_55 | GCTGGAGTGGGTCTCAGCTATTAGTGGTAGTGGTGG   |
| 1E01_IGHV3-23_Ser_55 | GGCTGGAGTGGGTCTCATCCATTAGTGGTAGTGGTGG  |
| 1E01_IGHV3-23_Thr_55 | GGCTGGAGTGGGTCTCAACCATTAGTGGTAGTGGTGG  |
| 1E01_IGHV3-23_S64N   | ATTAGTGGTAGTGGTGGTAATACATACTACGCAGACTC |
| 1E01_IGHV3-23_S64R   | AGTGGTAGTGGTGGTAGGACATACTACGCAGACTC    |
| 1E01_IGHV3-23_Y66F   | AGTGGTGGTAGTACATTCTACGCAGACTCCGTG      |
| 1E01_IGHV3-23_Y66D   | TTAGTGGTAGTGGTGGTAGTACAGACTACGCAGACT   |

**Supplementary Table 3** Crystallization conditions, data collection and crystal structure

features

| <b>Protein</b>         | <b>PDB code</b> | <b>Crystallization condition</b>                                              | <b>Data collection</b> | <b>Search model</b>                | <b>No. of molecules in asymmetric unit</b> | <b>Chains of the units</b>      |
|------------------------|-----------------|-------------------------------------------------------------------------------|------------------------|------------------------------------|--------------------------------------------|---------------------------------|
| 1E01 <sub>Fab</sub>    | 5IHZ            | 20 %w/v Polyethylene Glycol 3350, 0.200 M Potassium sulphate                  | Diamond I03            | 4Q9Q                               | 4                                          | (A B) (C D) (E F) (H L)         |
| 1E01 <sub>Fab</sub> -E | 5IFJ            | 0.2M Ammonium sulfate, 0.1M MES, pH=6.5, 20% PEG8000                          | Diamond I03            | 5IHZ                               | 4                                          | (A B C) (D E F) (G H I) (J K L) |
| 1E01 <sub>Fab</sub> -Q | 5IG7            | 0.2 M Ammonium sulfate 0.1 M Tris 7.5 20 % w/v PEG 5000 MME                   | Diamond I24            | 5IHZ                               | 4                                          | (A B C) (D E F) (G H I) (J K L) |
| 1E03 <sub>Fab</sub>    | 5IK3            | 0.2M Ammonium sulfate, 30% PEK8000                                            | Diamond I03            | 5IJK                               | 2                                          | (A B) (C D)                     |
| 1E03 <sub>Fab</sub> -E | 51JK            | 2.256M (NH <sub>4</sub> ) <sub>2</sub> SO <sub>4</sub> , 0.1M citrate, pH=5.0 | ESRF ID29              | 5IHZ heavy chain, 5IT2 light chain | 2                                          | (A C X) (B D Y)                 |
